1 **A single *cis*-element that controls cell-type specific expression in *Arabidopsis***

2

3 Jana Kneřová<sup>1\*</sup>, Patrick J. Dickinson<sup>1\*</sup>, Marek Szecówka<sup>1</sup>, Steven J. Burgess<sup>1</sup>, Hugh  
4 Mulvey<sup>1</sup>, Anne-Maarit Bågman<sup>2</sup>, Allison Gaudinier<sup>2</sup>, Siobhan M. Brady<sup>2</sup> and Julian M.  
5 Hibberd<sup>1</sup>

6

7 <sup>1</sup>Department of Plant Sciences, Downing Street, University of Cambridge, Cambridge CB2  
8 3EA, UK.

9 <sup>2</sup>Department of Plant Biology and Genome Center, UC Davis, California, 95616.

10

11 JK - j.knerova@gmail.com

12 PJD - pd373@cam.ac.uk

13 MS - szecowka@protonmail.com

14 SJB - sburgess011@gmail.com

15 HM - hughmulvey@gmail.com

16 AMB - ambagman@ucdavis.edu

17 AG - agaudinier@ucdavis.edu

18 SMB - sbrady@ucdavis.edu

19 JMH (corresponding) - jmh65@cam.ac.uk

20

21 \* These authors contributed equally

22

23 **Short title:** Cell-type specific gene expression in leaves.

24

25 **Keywords:** Cell-type specific gene expression, *cis*-element, *Arabidopsis*, bundle sheath.

26

27 **One sentence summary:** A single *cis*-element that is necessary and sufficient to drive  
28 expression in a specific cell-type is identified upstream of the *MYB76* transcription factor.

29 **Abstract**

30 In multicellular organisms the specification of distinct tissues within organs allows  
31 compartmentation of complex processes. However, the mechanisms that allow gene  
32 expression to be restricted to such tissues are poorly understood. To better understand  
33 this process, we focused on bundle sheath expression of the gene encoding the MYB76  
34 transcription factor in *Arabidopsis thaliana*. Functional and computational analyses were  
35 combined to identify a seven-nucleotide motif within a DNaseI hypersensitive site in the  
36 *MYB76* promoter that is necessary and sufficient to direct gene expression to bundle  
37 sheath cells. Thus, combining information from DNaseI hypersensitivity assays with  
38 classical truncation analysis allowed the rapid identification of a single *cis*-element that  
39 governs cell type-specificity. This motif is conserved in the Brassicaceae, acts to positively  
40 regulate gene expression, and is recognised *in planta* by two DREB transcription factors.  
41 In contrast to previous studies, these data indicate that the patterning of gene expression  
42 to specific cell types can be mediated by relatively simple interactions between *cis*-  
43 elements and transcription factors. Moreover, as the element in the *MYB76* promoter is  
44 short and can be oligomerized to tune expression levels it is well-suited for use in synthetic  
45 biology applications that require tissue specific expression in plants.

## 46 Introduction

47 Multicellular organisms consist of distinct tissues carrying out diverse and specialised  
48 functions. These tissues are defined by differences in function associated with their protein  
49 content, which in turn is determined by specific patterns of gene expression. Despite the  
50 importance of tissue specific gene expression, our understanding of how spatial patterning  
51 of gene expression is controlled is poor. In roots of *Arabidopsis thaliana* expression of  
52 *SHORTROOT (SHR)* is confined to the vasculature by a complex network of both  
53 activators and repressors (Sparks et al., 2016). Regulatory elements that are sufficient to  
54 drive hormone-responsive gene expression have also been described. For example, the  
55 synthetic promoter DR5 was created by multimerizing a mutated auxin response element  
56 and fusing this to the minimal CaMV35S (Ulmasov et al., 1997, 1995), and an  
57 oligomerised abscisic acid responsive element reports known centres of ABA signalling in  
58 roots (Wu et al., 2018). In both cases, these elements respond to hormonal and  
59 developmental triggers through diverse upstream signalling pathways (Wu et al., 2018). In  
60 comparison, our understanding of tissue specific gene expression in leaves is rudimentary,  
61 with mechanisms limiting gene expression to specific tissues being best understood in C<sub>4</sub>  
62 species where photosynthesis is typically compartmentalised between mesophyll and  
63 bundle sheath strands. For example, expression of the *Glycine decarboxylase P subunit*  
64 (*GLDPA*) in the bundle sheath and veins of C<sub>4</sub> *Flaveria bidentis* is due to interplay between  
65 regulatory regions (Wiludda et al., 2012). Activity of the distal promoter is high but not  
66 tissue-specific, however in the presence of a proximal promoter, expression in the bundle  
67 sheath is brought about by transcripts derived from the distal promoter being degraded in  
68 mesophyll cells through nonsense-mediated RNA decay of incompletely spliced transcripts  
69 (Engelmann et al., 2008; Wiludda et al., 2012). Similarly, two submodules in a distal region  
70 of the *Phosphoenolpyruvate carboxylaseA1 (PpcA1)* promoter from C<sub>4</sub> *Flaveria trinervia*  
71 are sufficient to confer mesophyll specificity that is enhanced by interaction with sequence  
72 in the proximal promoter (Gowik et al., 2004; Akyildiz et al., 2007). In addition to promoter  
73 sequences, other genic regions contain *cis*-elements that generate tissue-specific gene  
74 expression. For example, preferential expression of the *CARBONIC ANHYDRASE2*,  
75 *CARBONIC ANHYDRASE4* and *PYRUVATE, ORTHOPHOSPHATE DIKINASE* genes in  
76 mesophyll cells of the C<sub>4</sub> species *Gynandropsis gynandra* is mediated by a nine base pair  
77 motif present in both 5' and 3' untranslated regions (Williams et al., 2016). Moreover,  
78 preferential expression of *NAD-ME1&2* genes in the bundle sheath of *G. gynandra* is  
79 associated with two motifs known as Bundle Sheath Modules (BSM) 1a and 1b that co-  
80 operatively restrict gene expression to this tissue. BSM1a and BSM1b represent duons

81 because they are located in coding sequence and so determine amino acid composition as  
82 well as gene expression (Brown et al., 2011; Reyna-Llorens et al., 2018). In summary,  
83 tissue-specific expression can be generated through multiple mechanisms. However,  
84 single *cis*-elements that generate tissue specific patterning of gene expression via  
85 interaction with their cognate transcription factors have not yet been identified.

86 To better understand the regulation of gene expression in specific cell-types we  
87 focussed on the bundle sheath in the C<sub>3</sub> species *A. thaliana*. The bundle sheath  
88 represents about 15% of cells in leaves of *A. thaliana* (Kinsman and Pyke, 1998) and has  
89 been proposed to play important roles in hydraulic conductance (Shatil-Cohen et al.,  
90 2011), transport of metabolites (Leegood, 2008), as well as storage of carbohydrates  
91 (Koroleva et al., 1997), ions (Williams et al., 2018) and water (Sage, 2001; Griffiths et al.,  
92 2013). A number of findings are also consistent with bundle sheath cells being involved in  
93 sulphur metabolism and glucosinolate biosynthesis. First, the promoter of the *SULPHUR*  
94 *TRANSPORTER2.2* generates preferential expression in the bundle sheath sheath  
95 (Takahashi et al., 2000; Kirschner et al., 2018) and secondly, compared with the whole  
96 leaf, transcripts encoding enzymes of sulphur metabolism are more abundant on bundle  
97 sheath ribosomes (Aubry et al., 2014). Notably, so called S-cells that accumulate high  
98 levels of sulphur lie just inside the abaxial bundle sheath and are thought to be specialised  
99 for defence against insects penetrating the phloem (Koroleva et al., 2010). It is therefore  
100 possible that the bundle sheath synthesises sulphur-rich compounds and transports them  
101 for storage in the S-cells. Glucosinolate biosynthesis is regulated by MYB domain  
102 transcription factors. One such transcription factor is MYB76, which contains the canonical  
103 R2R3 MYB DNA-binding domain (Stracke et al., 2001) and acts with MYB28, MYB29 and  
104 three basic helix-loop-helix transcription factors to regulate the methionine-derived  
105 glucosinolate biosynthetic pathway (Gigolashvili et al., 2007; Sønderby et al., 2007, 2010;  
106 Li et al., 2013; Schweizer et al., 2013; Malitsky et al., 2008). Transcripts of *MYB76* and  
107 other MYB domain transcription factors involved in glucosinolate biosynthesis are  
108 preferentially associated with bundle sheath ribosomes (Aubry et al., 2014) and the  
109 *MYB76* promoter has been reported to generate vascular specific expression (Tamara et  
110 al., 2007); however, how their expression is restricted to the vasculature is not known.

111 As there are few examples of *cis*-elements that are necessary and sufficient for cell  
112 type-specific expression in plants, we sought to use *MYB76* as a model for this process. A  
113 classical truncation analysis of *MYB76* was combined with computational interrogation of  
114 transcription factor binding sites to identify a 250-nucleotide region required for expression  
115 in the *A. thaliana* bundle sheath. Within this region a seven base pair motif was identified

116 that is both necessary and sufficient for patterning gene expression in this cell type. This  
117 sequence is bound by two transcription factors in the DREB family. The short *cis*-element  
118 from *MYB76* therefore provides insight into regulatory mechanisms that direct gene  
119 expression to specific cells of plants, identifies a single DNA motif that could be used to  
120 engineer expression of genes required for the efficient C<sub>4</sub> pathway into bundle sheath cells  
121 of C<sub>3</sub> species, and provides proof-of-principle that by combining classical truncation and  
122 computational analysis, short regions of DNA that are suitable for use in synthetic biology  
123 to pattern gene expression in specific cell types can be identified.

124 **Results**

125 *The MYB76 promoter contains a positive regulator directing expression to the bundle*  
126 *sheath*

127 Expression patterns can be determined by *cis*-elements in promoters, UTRs, exons,  
128 introns or downstream 3' regions (Ali and Taylor, 2001; Brown et al., 2011; Kajala et al.,  
129 2011; Williams et al., 2016; Gallegos and Rose, 2017). Therefore, to gain insight into the  
130 spatial patterning of *MYB76* a translational fusion between the *MYB76* genomic sequence  
131 and the *uidA* reporter was generated. Transgenic lines harbouring this genomic fusion  
132 showed preferential accumulation of GUS in the bundle sheath (Figure 1A, Supplemental  
133 Figure 1). A construct consisting of nucleotides -1725 to +279 relative to the predicted  
134 translational start site was also sufficient to direct GUS to bundle sheath strands (Figure  
135 1B, Supplemental Figure 2). Use of the fluorometric 4-MethylUmbelliferyl  $\beta$ -D-Glucuronide  
136 (MUG) assay showed that GUS accumulation was lower when nucleotides +280 to +1254  
137 were included (Figures 1A and 1B). We conclude that nucleotides -1725 to +279 of  
138 *MYB76* contain one or more elements that are sufficient to generate expression in the  
139 bundle sheath. Moreover, the full genomic sequence of *MYB76* contains regulators that  
140 quantitatively repress expression, but these do not override the ability of the promoter and  
141 5' end of the gene to generate GUS accumulation in bundle sheath cells.

142 To investigate the elements driving *MYB76* expression in the bundle sheath, additional  
143 5' deletions were generated (Figures 1C to 1E). Removal of nucleotides -1725 to -1264 did  
144 not impact on GUS accumulation in the bundle sheath (Figure 1C, Supplemental Figure 3)  
145 however once nucleotides -1264 to -796 were removed GUS accumulation in the bundle  
146 sheath was no longer detectable (Figure 1D, Supplemental Figure 4) and removal of  
147 another 500 base pairs had no further impact on the spatial pattern of GUS accumulation  
148 (Figure 1E, Supplemental Figure 5). Quantification *via* MUG assays (Figures 1A to 1E  
149 right) showed that removal of nucleotides -1725 to -1264 reduced accumulation of the  
150 reporter, and MUG was no longer detectable once sequence upstream of nucleotide -796  
151 was absent. Overall, these data indicate that *MYB76* contains at least one site within the  
152 gene that represses expression, a region between nucleotides -1725 and -1264 that acts  
153 to enhance expression, and a region between nucleotides -1264 and -796 that directs  
154 expression to the bundle sheath.

155

156 *A DNaseI hypersensitive site within the MYB76 promoter is necessary and sufficient to*  
157 *direct expression to the A. thaliana bundle sheath*

158 The DNaseI enzyme preferentially cuts accessible DNA and so can be used to define  
159 sequences available for transcription factor binding. To complement our truncation  
160 analysis, an existing dataset that defined DNaseI Hypersensitive Sites (DHS) in *A. thaliana*  
161 (Zhang et al., 2012) was interrogated. Two DHS were detected upstream of MYB76 in  
162 both flower tissue and leaves, but only one (from nucleotides -909 to -654) overlapped with  
163 the region required for expression in the bundle sheath (Figure 2A). Removing this entire  
164 region abolished accumulation of GUS (Figure 2B, Supplemental Figure 6) whereas fusing  
165 it to the minimal CaMV35S promoter led to accumulation of GUS in the bundle sheath  
166 (Figure 2C, Supplemental Figure 7). Furthermore, oligomerizing two copies of the DHS  
167 upstream of the minimal CaMV35S promoter resulted in very strong accumulation of GUS  
168 in the bundle sheath (Figure 2D, Supplemental Figure 8). We conclude that sequence  
169 within this DHS is both necessary and sufficient for preferential expression of *MYB76* in  
170 the bundle sheath. Combined with the truncation analysis indicating that nucleotides -1264  
171 to -796 are required for expression in the bundle sheath (Figures 1C and 1D), these data  
172 show that a positive regulator of bundle sheath expression is located between nucleotides  
173 -909 (the start of the DHS) and -796 upstream of *MYB76*.

174 To provide further insight into the DHS upstream of *MYB76* we assessed the extent to  
175 which sequence in this region was conserved both within accessions of *A. thaliana*, and  
176 more broadly within the Brassicaceae. Interrogation of the 1001 Genome database  
177 (Consortium, 2016) indicated that these accessions possess ten single nucleotide  
178 polymorphisms of which only four were located between nucleotides -909 and -796 that  
179 are necessary for expression in the bundle sheath (Figure 3A). An alignment of this region  
180 to five other species in the Brassicaceae identified two broad regions (from -909 to -870,  
181 and from -826 to -792) that appeared reasonably conserved (Figure 3B). Analysis of the  
182 whole promoter in these species confirmed this and indicated that other than the ~250  
183 nucleotides directly upstream of the predicted translational start site, these two regions are  
184 located in sequence that is more conserved than other parts of the promoter ( $p$ -value <  
185 0.0001, Figure 3C).

186

187 *A motif within the DHS is necessary and sufficient for bundle sheath-preferential*  
188 *expression*

189 Two orthogonal approaches were combined to identify a seven-nucleotide sequence in  
190 the DHS upstream of *MYB76* that is sufficient to specify bundle sheath preferential

191 expression. First, DNaseI-SEQ data can be used to identify specific protein binding  
192 footprints known as Digital Genomic Footprints (DGF) that represent short DNA motifs  
193 bound by transcription factors (Hesselberth et al., 2009). Re-analysis of the Zhang *et al*  
194 (2012) dataset identified two such DGF between nucleotides -909 and -796 upstream of  
195 *MYB76* (Figure 4A). Second, phylogenetic footprinting identified two motifs (Figure 3B)  
196 shared by *MYB76* as well as the promoters of *SCR*, *SULTR2.2* and *GLDP* that have  
197 previously been reported to generate expression in the *A. thaliana* bundle sheath  
198 (Takahashi et al., 2000; Wysocka-Diller et al., 2000; Engelmann et al., 2008; Kirschner et  
199 al., 2018). Site directed mutagenesis of the first of these motifs (TGGGCA) had no impact  
200 on accumulation of GUS in the bundle sheath (Supplemental Figure 9). The second of  
201 these motifs (TGCACCG) overlapped with the CGAAAACGTGCAC sequence defined by  
202 one DGF (Figure 4C) and also coincided with the truncation that abolished expression in  
203 the bundle sheath (Figure 1D). Substitution of the motif TGCACCG with random sequence  
204 abolished GUS accumulation in all twelve independent lines inspected (Figure 4D,  
205 Supplemental Figure 10). To test whether this sequence is sufficient to restrict expression  
206 to the bundle sheath, it was combined with ten upstream and ten downstream nucleotides  
207 within the context of the endogenous *MYB76* promoter, oligomerized and fused to GUS.  
208 This construct generated preferential expression in the bundle sheath (Figure 4E,  
209 Supplemental Figure 11). We conclude that this motif, identified from deletion analysis,  
210 phylogenetic footprinting and DNaseI sequencing, is both necessary and sufficient to  
211 generate bundle sheath specific expression.

212

213 *DREB2A and DREB26 bind the region of MYB76 that drives expression in the bundle*  
214 *sheath*

215 In order to identify transcription factors that interact with the region of the *MYB76*  
216 promoter that is necessary and sufficient for bundle sheath expression a Yeast One-Hybrid  
217 screen was performed (Gaudinier et al., 2011, 2017; Reece-Hoyes et al., 2011). This  
218 identified thirteen transcription factors that interacted with the DHS (Figure 5A). Binding  
219 sites for eight of these have been defined using DAP-seq (O'Malley et al., 2016) and so we  
220 scanned the DHS for these motifs using the FIMO tool (Grant et al., 2011). This identified  
221 putative binding sites ( $p < 0.001$ ) in the DHS for DREB26, DREB2A, DF1 and MYB73  
222 (Figure 5B, Supplemental Table 1). The putative DF1 and MYB73 binding sites are  
223 downstream of the sequence required to generate bundle sheath expression in *A. thaliana*  
224 (Figure 5B). But, the TOMTOM algorithm (Gupta et al., 2007) indicated that the  
225 TGCACCG sequence, shown to be necessary for expression in the bundle sheath (Figure



226 4D), is similar to the DREB26 and DREB2A binding sites but not to those of DF1 or  
227 MYB73 (Figure 5C). In fact, the binding sites of DREB26 and DREB2A overlap with this  
228 TGCACCG motif (Figure 5B) which is shared with the *SULTR2;2*, *SCR* and *GLDP*  
229 promoters that also generate bundle sheath expression in *A. thaliana*. Although not linked  
230 to cell type-specific gene expression, interaction between DREB26 and the *MYB76*  
231 promoter has been reported previously (Li et al., 2013). To confirm that these DREB  
232 transcription factors interact with the DHS *in planta* we performed a *trans*-activation assay  
233 in *Nicotiana benthamiana*. Co-infiltration of DREB2A and DREB26 with the DHS fused to  
234 the GUS reporter drove GUS accumulation in leaves of *N. benthamiana* (Figure 5D). We  
235 therefore conclude that both DREB2A and DREB26 can interact with sequence centred on  
236 the TGCACCG motif which generates cell type-specific expression in the *A. thaliana*  
237 bundle sheath.

## 238 Discussion

239 Deletion and truncation analyses have been used for decades to better understand the  
240 role of *cis*-elements in gene expression. However, there are relatively few examples of  
241 such elements that have been shown to underpin spatial patterning of gene expression in  
242 plants (Akyildiz et al., 2007; Brown et al., 2011; Wiludda et al., 2012; Reyna-Llorens et al.,  
243 2018; Williams et al., 2016). DNaseI-seq analysis has recently been adopted to define  
244 interactions between DNA sequence and transcription factors on a genome-wide basis but  
245 the binding sites of some transcription factors remain undefined, and individual genes are  
246 typically bound by multiple transcription factors. It is therefore not always possible to link  
247 individual binding sites either to a particular transcription factor or to a specific function.  
248 However, through identification of DHS sites that are distant from gene bodies and  
249 functional testing in *A. thaliana*, multiple enhancers of gene expression have been  
250 identified (Zhu et al., 2015; Sullivan et al., 2014). Using an analogous approach that  
251 combines deletion analysis with candidate transcription factor binding sites predicted from  
252 DNaseI-seq (Zhang et al., 2012), we were able to identify one sequence motif that is both  
253 necessary and sufficient to drive gene expression in the bundle sheath of *A. thaliana*. This  
254 finding implies that bringing these two approaches together allows relatively rapid progress  
255 in identifying specific *cis*-elements responsible for determining a particular pattern of gene  
256 expression.

257 Within *MYB76*, a single *cis*-element that is necessary and sufficient to direct bundle  
258 sheath expression in *A. thaliana* was identified. This contrasts with previous work that  
259 indicated more complex regulatory networks underpin tissue specific gene expression.  
260 This includes combinatorial interactions between multiple activators and repressors that  
261 restrict *SHR* expression to the root vasculature of *A. thaliana* (Sparks et al., 2017), two  
262 duons in the coding sequence of *NAD-ME* in *G. gynandra* that act together to repress  
263 expression in mesophyll cells (Reyna-Llorens et al., 2018), and in the case of *GLDPA*  
264 gene from *F. bidentis*, nonsense-mediated RNA decay of incompletely spliced transcripts  
265 from a constitutive distal promoter in mesophyll cells that is mediated by a more proximal  
266 promoter (Wiludda et al., 2012). To our knowledge, the simplest regulatory system that  
267 has been shown to generate tissue specific patterning of gene expression is the mesophyll  
268 enhancing module in the *PpcA1* promoter of *C<sub>4</sub> Flaveria trinervia*. This sequence is made  
269 up of two sub-modules located in the promoter (Akyildiz et al., 2007). Thus, in all cases  
270 multiple *cis*-elements, presumably bound by multiple transcription factors, are responsible  
271 for patterning gene expression. In contrast, the TGCACCG motif that is both necessary  
272 and sufficient for expression in the *A. thaliana* bundle sheath is a relatively simple module.

273 From our data we propose that *MYB76* patterning is mediated by the interaction of  
274 TGCACCG motif with transcription factors belonging to the DREB family. We show that  
275 DREB2A and DREB26 bind the *MYB76* DHS both in yeast and *in planta* and that the  
276 TGCACCG *cis*-element overlaps with putative binding sites for these transcription factors.  
277 Although transcripts of *DREB2A* and *DREB26* are not specifically associated with  
278 ribosomes in the bundle sheath (Aubry et al., 2014), it is possible that neighbouring  
279 sequence to the TGCACCG motif is bound by a different transcription factor which is itself  
280 bundle sheath specific and that this facilitates the binding of DREB2A and DREB26 to  
281 activate *MYB76* expression *in vivo*. But, no annotated transcription factor binding sites are  
282 close to the TGCACCG motif. It is also possible that a related DREB transcription factor  
283 with similar binding specificity to DREB2A and DREB26 that is specific to the *A. thaliana*  
284 bundle sheath activates *MYB76* in this cell type. Of the 57 annotated DREB transcription  
285 factors, six are preferentially expressed in the bundle sheath ( $\log_2 \text{BS}/35\text{s} > 1$ , PPDE >  
286 0.9) (Supplemental Data 1) (Aubry et al., 2014). However, none of these six transcription  
287 factors were identified in the yeast one hybrid screen, and even if they did bind *in vivo*,  
288 because DREB2A and DREB26 transcripts both accumulate in mesophyll cells, it is not  
289 clear how this would lead to bundle sheath specific expression of *MYB76*. An alternate  
290 mechanism that might explain our findings is that binding of DREB2A and/or DREB26  
291 patterns *MYB76* expression directly because they are limited to the bundle sheath by post-  
292 transcriptional and/or post-translational mechanisms. In fact, post-transcriptional and post-  
293 translational regulation has been reported for DREB2A (Agarwal et al., 2017) with post-  
294 transcriptional regulation by alternative splicing shown in grasses (Matsukura et al., 2010;  
295 Egawa et al., 2006; Feng et al., 2007) and *A. thaliana* (Vainonen et al., 2012). Moreover,  
296 whilst overexpression of *DREB2A* in *A. thaliana* does not affect the expression of target  
297 genes (Liu et al., 1998) an isoform lacking key phosphorylation sites activates the majority  
298 of DREB2A target genes (Sakuma et al., 2006). As far as we are aware there are no  
299 reports of post-translational regulation of DREB26 activity and this may be an interesting  
300 area for future research. As the evidence above suggests that DREB2A and DREB26 bind  
301 the *MYB76* DHS to activate expression and they have binding sites overlapping the  
302 TGCACCG motif, we favour a model where DREB2A and/or DREB26 are specifically  
303 activated post-transcriptionally or post-translationally in the bundle sheath.

304 The comparatively simple architecture associated with the TGCACCG motif is relevant  
305 to bioengineering and use in synthetic biology applications. Generating synthetic  
306 promoters is one of the major requirements for synthetic biology (Dey et al., 2015). Short  
307 synthetic promoters have a number of advantages over the long promoter fragments

308 currently available to direct gene expression to bundle sheath cells (Takahashi et al.,  
309 2000; Wysocka-Diller et al., 2000). These include reducing the likelihood of homology-  
310 based gene silencing if used more than once in any construct (Bhullar et al., 2003), and  
311 decreasing the chances of leakiness or off-target gene expression associated with use of  
312 full-length promoter fragments (Hernandez-Garcia and Finer, 2014). Oligomerization of  
313 *cis*-elements to achieve higher expression levels is a common strategy when creating  
314 synthetic promoters (Dey et al., 2015). As the *MYB76* DHS is short and can be  
315 oligomerized to tune expression levels, it appears to be particularly suitable for use in  
316 synthetic promoters.

317 Overall, we conclude that in addition to distant DHS from gene bodies being excellent  
318 candidates for enhancer elements (Zhu et al., 2015), for genes that are preferentially  
319 expressed in specific cell types, DHS also represent good candidates for *cis*-elements  
320 controlling the patterning of gene expression. Moreover, as with hormone responsiveness  
321 (Ulmasov et al., 1997, 1995; Wu et al., 2018), our data indicate that cell-type specific gene  
322 expression can be mediated by a simple element in *cis*, and that the *MYB76* DHS is  
323 suitable to drive or manipulate gene expression in the bundle sheath. Uses could include  
324 the targeted manipulation of storage carbohydrates and ions (Koroleva et al., 1997;  
325 Williams et al., 2018), the control of hydraulic conductance (Sage 2001; Griffiths et al.,  
326 2013; Shatil-Cohen et al., 2011), the transport of metabolites in and out of veins (Leegood,  
327 2008), responses to high light episodes (Fryer et al., 2003), and improvements to  
328 photosynthesis (Wang et al., 2017) in these cells.

## 329 **Methods**

### 330 **Plant Growth**

331 Seed of *A. thaliana* was washed in 70% (v/v) ethanol for 5 minutes, sterilised in a  
332 solution of 10% (v/v) Sodium Hypochlorite and 0.1% (v/v) Tween20 for 20 minutes and  
333 rinsed five times in sterile distilled water prior to being selected on 0.5% (w/v) Murasige &  
334 Skoog medium (pH 5.8), 1% (w/v) agar, 50mg l<sup>-1</sup> Kanamycin and 100mg l<sup>-1</sup> Timentin. After  
335 3 days of stratification in the dark at 4°C, tissue culture plates were transferred to a 16  
336 hour photoperiod growth chamber with a light intensity of 200 μmol m<sup>-2</sup> s<sup>-1</sup> photon flux  
337 density, 65% relative humidity and a temperature cycle of 24°C (day) and 20°C (night).  
338 After 12 days, transformed seedlings were transferred onto 1:1 Levington M3 high nutrient  
339 compost and Sinclair fine Vermiculite soil mixture and grown for another 2-3 weeks before  
340 analysis. *N. benthamiana* plants used for transient assays were grown from seed in pots  
341 containing the same soil mixture in a 16 hour photoperiod, at 200 μmol m<sup>-2</sup> s<sup>-1</sup> photon flux  
342 density, 60% relative humidity and 22°C.

343

### 344 **Generation of constructs, stable plant transformation and computational analysis**

345 The full length *MYB76* gene as well as the promoter alone were amplified from *A.*  
346 *thaliana Col-0* genomic DNA and then fused to *uidA*. The minimal CaMV35S promoter was  
347 synthesised and fused to *MYB76 DHS* by polymerase chain reaction (PCR). Deletion of  
348 the DHS within the promoter was achieved by PCR fusion of the 5' end of the promoter  
349 with the 3' end of the promoter prior to being cloned into the pENTR/D TOPO vector. Each  
350 forward primer contained a CACC overhang to ensure directional cloning. A Gateway LR  
351 reaction was performed to transfer the relevant inserts into a modified pGWB3 vector  
352 (Nakagawa et al., 2007) that contained an intron within the *uidA* sequence. The *MYB76*  
353 genomic *DNA::uidA* and 2xDHSCaMV35SMin::uidA constructs were made using Golden  
354 Gate technology (Weber et al., 2011). To mutate the TGCACCG motif within the *MYB76*  
355 promoter the QuikChange Lightning Site-Directed Mutagenesis (Agilent Technologies) was  
356 used. All constructs were then placed into *Agrobacterium tumefaciens* strain GV3101 and  
357 introduced into *A. thaliana Col-0* by floral dipping (Clough and Bent, 1998).

358 The MEME tool from The Multiple Em for Motif Elucidation (MEME) suite v.4.8.1. (Bailey  
359 et al., 2009) was applied to search for conserved motifs within promoter sequences of  
360 genes expressed in the *A. thaliana* bundle sheath. Maximum length of the motif was set to  
361 8 nucleotides, both strands of the sequence were searched and each motif had to be  
362 present in every sequence. The alignment of the positive regulatory region amongst the  
363 Brassicaceae was generated using the MUSCLE algorithm (Edgar, 2004) and edited

364 manually. The online tool Evolutionary Analysis of Regulatory Sequences (EARS) (Emma  
365 et al., 2010) was used, with window size set to 100 nucleotides and the significance  
366 threshold set at  $p = 0.0001$  to predict regulatory regions within non-coding sequences of  
367 *MYB76* homologues in Brassicaceae.

368

### 369 **Histochemical analysis of GUS localisation and quantitative analysis of MUG**

370 GUS staining of at least nine T1 plants of each *uidA* fusion construct was performed  
371 according to (Jefferson et al., 1987). Analysis of multiple T1 plants allows position effects  
372 associated with transgene insertion to be averaged out. The staining solution contained  
373 0.1 M  $\text{Na}_2\text{HPO}_4$  pH 7.0, 2 mM Potassium ferricyanide, 2 mM Potassium ferrocyanide, 10  
374 mM EDTA pH 8.0, 0.06% (v/v) Triton X-100 and 0.5 mg  $\text{ml}^{-1}$  X-gluc. Leaves from three-  
375 week old plants were vacuum-infiltrated three times in GUS solution for one minute and  
376 then incubated at 37°C for between 3 and 72 hrs depending on the strength of the  
377 promoter being assessed. Next, stained samples were fixed in 3:1 (v/v) ethanol:acetic acid  
378 for 30 minutes at room temperature, cleared in 70% (v/v) ethanol at 37°C and then placed  
379 in 5 M NaOH for 2 hrs. Samples were stored in 70% (v/v) ethanol at 4°C. To quantify  
380 reporter accumulation from each promoter a quantitative assay that assesses the rate of  
381 MUG conversion to 4-methylumbelliferone (MU) was performed (Jefferson et al., 1987) on  
382 between 10 and 25 lines. Tissue was frozen in liquid nitrogen, homogenised and soluble  
383 protein extracted in 5 volumes of Protein extraction buffer (1 mM  $\text{MgCl}_2$ , 100 mM NaCl, 50  
384 mM Tris pH7.8). 15  $\mu\text{l}$  of protein extract was incubated with 60  $\mu\text{l}$  of MUG at 37 °C for one,  
385 two, three and four hours respectively. The reaction was stopped after each time point by  
386 addition of 75  $\mu\text{l}$  200 mM anhydrous sodium carbonate. GUS activity was analysed via  
387 measurements of fluorescence of MU at 455 nm after excitation at 365 nm. The  
388 concentration of MU/unit fluorescence in each sample was interpolated using a  
389 concentration gradient of MU over a linear range.

390

### 391 **Yeast One-Hybrid analysis and interaction assays in *Nicotiana benthamiana***

392 Regions screened for transcription factor binding via Yeast One-Hybrid were first  
393 inserted into pENTR 5'TOPO TA entry vector (Thermofisher) and subsequently placed into  
394 the pMW2 and pMW3 destination vectors containing *Histidine* and  $\beta$ -*Galactosidase* marker  
395 genes respectively (Deplancke et al., 2006). The enhanced Yeast One-Hybrid screen  
396 against a complete collection of 2000 *A. thaliana* transcription factors was undertaken as  
397 described previously (Gaudinier et al., 2017, 2011; Pruneda-Paz et al., 2014).

398 To test interactions between promoter regions and transcription factors *in planta*  
399 transient infiltration of *N. benthamiana* was performed. Overnight cultures of  
400 *Agrobacterium tumefaciens* strain GV3101 carrying a promoter::*uidA* fusion, as well as a  
401 transcription factor under control of the CaMV35S promoter and the *P19* gene to suppress  
402 RNA silencing activity were pelleted and then re-suspended in infiltration media (10 mM  
403 MgCl<sub>2</sub>, 10 mM MES-KOH pH 5.6 and 150 μM acetosyringone). The optical density of  
404 cultures was assessed at 600 nm and adjusted to 0.3 for promoter constructs, 1.0-2.0 for  
405 transcription factors (Ma et al., 2013) and 0.5 for the *P19* construct. Cultures were  
406 incubated at 28°C for two to four hours and then mixed in 1:1:1 ratio. The abaxial side of  
407 leaves from three-week old plants were inoculated with a 1 ml syringe. Leaves were  
408 analysed 72 hrs after inoculation.

409 **Supplemental Legends**

410 **Supplemental Figure 1:** The genomic sequence of MYB76 fused to GUS generates  
411 expression in the bundle sheath of Arabidopsis. Images from eleven independent  
412 transgenic lines Leaves were stained for 72 hours except line 11 which was stained for  
413 48hrs. Scale bars represent 100  $\mu\text{m}$ .

414 **Supplemental Figure 2:** Nucleotides -1725 to +279 relative to the predicted translational  
415 start site of MYB76 generate preferential expression in the bundle sheath. Images from  
416 twelve independent transgenic lines. Leaves were stained for 30 hours. Scale bars  
417 represent 100  $\mu\text{m}$ .

418 **Supplemental Figure 3:** Nucleotides -1264 to +279 relative to the predicted translational  
419 start site of MYB76 generate preferential expression in the bundle sheath. Images from  
420 twelve independent transgenic lines. Leaves were stained for 48 hours. Scale bars  
421 represent 100  $\mu\text{m}$ .

422 **Supplemental Figure 4:** Nucleotides -796bp to +279 relative to the predicted translational  
423 start site of MYB76 do not generate preferential expression in the bundle sheath. Images  
424 from ten independent transgenic lines. Leaves were stained for 30 hours. Scale bars  
425 represent 100  $\mu\text{m}$ .

426 **Supplemental Figure 5:** Nucleotides -294bp to +279 relative to the predicted translational  
427 start site of MYB76 do not generate preferential expression in the bundle sheath. Images  
428 from ten independent transgenic lines. Leaves were stained for 30 hours. Scale bars  
429 represent 100  $\mu\text{m}$ .

430 **Supplemental Figure 6:** Deleting the MYB76 DHS abolishes accumulation of GUS in the  
431 bundle sheath. Images from five independent transgenic lines. Leaves were stained for 48  
432 hours. Scale bars represent 100  $\mu\text{m}$ .

433 **Supplemental Figure 7:** The MYB76 DHS combined with the minimal 35SCaMV promoter  
434 generates preferential expression in the bundle sheath. Images from twelve independent  
435 transgenic lines. Leaves were stained for 72 hours. Scale bars represent 100  $\mu\text{m}$ .

436 **Supplemental Figure 8:** Oligomerizing the MYB76 DHS combined with the minimal  
437 35SCaMV promoter generates strong bundle sheath preferential expression. Images from  
438 twelve independent transgenic lines. Leaves were stained for 3 hours. Scale bars  
439 represent 100  $\mu\text{m}$ .

440 **Supplemental Figure 9:** Mutation of the TGGGCA motif does not abolish accumulation of  
441 GUS from the bundle sheath. Images from twelve independent transgenic lines. Leaves  
442 were stained for 48 hours. Scale bars represent 100  $\mu\text{m}$ .



443 **Supplemental Figure 10:** Mutation of the TGCACCG motif leads to loss of GUS in the  
444 bundle sheath. Images from twelve independent transgenic lines. Leaves were stained for  
445 48 hours. Scale bars represent 100  $\mu$ m.

446 **Supplemental Figure 11:** Two copies of the TGCACCG motif combined with ten  
447 upstream and ten downstream nucleotides within the context of the native *MYB76*  
448 promoter fused to the minimal 35SCaMV promoter generate preferential expression in the  
449 bundle sheath. Images from seven independent transgenic lines. Leaves were stained for  
450 30 hours. Scale bars represent 100  $\mu$ m.

451

452

453

454 **Acknowledgements:** JK was supported a Derek Brewer Studentship from Emmanuel  
455 College Cambridge, PJD by Advanced ERC Grant 694733 Revolution, and MS by BBSRC  
456 grant RG75840, SJB was supported by the 3to4 grant from the EU and BB/I002243 from  
457 the BBSRC to JMH. SB is funded by an HHMI Faculty Scholar Fellowship.

458

459 **Contributions:** JK, PJD, MS, SJB and HM conducted the analysis *in planta*. A-M B and  
460 AG conducted yeast-one hybrid. JK, PJD, SMB and JMH designed and wrote the  
461 manuscript and prepared the figures.

462 **References**

- 463 Agarwal, P.K., Gupta, K., Lopato, S., and Agarwal, P. (2017). Dehydration responsive  
464 element binding transcription factors and their applications for the engineering of  
465 stress tolerance. *J. Exp. Bot.* 68: 2135–2148.
- 466 Akyildiz, M., Gowik, U., Engelmann, S., Koczor, M., Streubel, M., and Westhoff, P. (2007).  
467 Evolution and function of a *cis*-regulatory module for mesophyll-specific gene  
468 expression in the C<sub>4</sub> dicot *Flaveria trinervia*. *Plant Cell* 19: 3391–3402.
- 469 Ali, S. and Taylor, W.C. (2001). The 3' non-coding region of a C<sub>4</sub> photosynthesis gene  
470 increases transgene expression when combined with heterologous promoters. *Plant*  
471 *Mol. Biol.* 46: 325–333.
- 472 Aubry, S., Smith-Unna, R.D., Bournnell, C.M., Kopriva, S., and Hibberd, J.M. (2014).  
473 Transcript residency on ribosomes reveals a key role for the *Arabidopsis thaliana*  
474 bundle sheath in sulfur and glucosinolate metabolism. *Plant J.* 78: 659–673.
- 475 Bailey, T.L., Boden, M., Buske, F.A., Frith, M., Grant, C.E., Clementi, L., Ren, J., Li, W.W.,  
476 and Noble, W.S. (2009). MEME Suite: tools for motif discovery and searching. *Nucleic*  
477 *Acids Res.* 37: W202–W208.
- 478 Bhullar, S., Chakravarthy, S., Advani, S., Datta, S., Pental, D., and Burma, P.K. (2003).  
479 Strategies for Development of Functionally Equivalent Promoters with Minimum  
480 Sequence Homology for Transgene Expression in Plants: *cis*-Elements in a Novel  
481 DNA Context versus Domain Swapping. *Plant Physiol.* 132: 988 LP-998.
- 482 Brown, N.J., Newell, C.A., Stanley, S., Chen, J.E., Perrin, A.J., Kajala, K., and Hibberd,  
483 J.M. (2011). Independent and Parallel Recruitment of Preexisting Mechanisms  
484 Underlying C<sub>4</sub> Photosynthesis. *Science.* 331: 1436–1439.
- 485 Clough, S.J. and Bent, A.F. (1998). Floral dip: a simplified method for *Agrobacterium*-  
486 mediated transformation of *Arabidopsis thaliana*. *Plant J.* 16: 735–743.
- 487 Consortium, 1001 Genomes (2016). 1,135 Genomes Reveal the Global Pattern of  
488 Polymorphism in *Arabidopsis thaliana*. *Cell* 166: 481–491.
- 489 Deplancke, B. et al. (2006). A Gene-Centered *C. elegans* Protein-DNA Interaction  
490 Network. *Cell* 125: 1193–1205.
- 491 Dey, N., Sarkar, S., Acharya, S., and Maiti, I.B. (2015). Synthetic promoters *in planta*.  
492 *Planta* 242: 1077–1094.
- 493 Edgar, R.C. (2004). MUSCLE: multiple sequence alignment with high accuracy and high  
494 throughput. *Nucleic Acids Res.* 32: 1792–1797.
- 495 Egawa, C., Kobayashi, F., Ishibashi, M., Nakamura, T., Nakamura, C., and Takumi, S.  
496 (2006). Differential regulation of transcript accumulation and alternative splicing of a

- 497 *DREB2* homolog under abiotic stress conditions in common wheat. *Genes Genet.*  
498 *Syst.* 81: 77–91.
- 499 Emma, P., Peter, K., Alexander, T., Isabelle, C., and Sascha, O. (2010). Evolutionary  
500 analysis of regulatory sequences (EARS) in plants. *Plant J.* 64: 165–176.
- 501 Engelmann, S., Wiludda, C., Burscheidt, J., Gowik, U., Schlue, U., Koczor, M., Streubel,  
502 M., Cossu, R., Bauwe, H., and Westhoff, P. (2008). The gene for the P-subunit of  
503 glycine decarboxylase from the C<sub>4</sub> species *Flaveria trinervia*: analysis of  
504 transcriptional control in transgenic *Flaveria bidentis* (C<sub>4</sub>) and *Arabidopsis* (C<sub>3</sub>). *Plant*  
505 *Physiol.* 146: 1773–1785.
- 506 Feng, Q., Masayuki, K., Yoh, S., Kyonoshin, M., Yuriko, O., Phan, T.L.-S., Kazuo, S., and  
507 Kazuko, Y.-S. (2007). Regulation and functional analysis of *ZmDREB2A* in response  
508 to drought and heat stresses in *Zea mays* L. *Plant J.* 50: 54–69.
- 509 Fryer, M.J., Ball, L., Oxborough, K., Karpinski, S., Mullineaux, P.M., and Baker, N.R.  
510 (2003). Control of Ascorbate Peroxidase 2 expression by hydrogen peroxide and leaf  
511 water status during excess light stress reveals a functional organisation of *Arabidopsis*  
512 leaves. *Plant J* 33: 691–705.
- 513 Gallegos, J.E. and Rose, A.B. (2017). Intron DNA Sequences Can Be More Important  
514 Than the Proximal Promoter in Determining the Site of Transcript Initiation. *Plant Cell.*
- 515 Gaudinier, A. et al. (2011). Enhanced Y1H assays for Arabidopsis. *Nat. Methods* 8:  
516 10.1038/nmeth.1750.
- 517 Gaudinier, A., Tang, M., Bågman, A.-M., and Brady, S.M. (2017). Identification of Protein–  
518 DNA Interactions Using Enhanced Yeast One-Hybrid Assays and a Semiautomated  
519 Approach BT - *Plant Genomics: Methods and Protocols*. In W. Busch, ed (Springer  
520 New York: New York, NY), pp. 187–215.
- 521 Gigolashvili, T., Yatusевич, R., Berger, B., Müller, C., and Flügge, U. (2007). The R2R3-  
522 MYB transcription factor HAG1/MYB28 is a regulator of methionine-derived  
523 glucosinolate biosynthesis in *Arabidopsis thaliana*. *Plant J.* 51: 247–261.
- 524 Gowik, U., Burscheidt, J., Akyildiz, M., Schlue, U., Koczor, M., Streubel, M., and Westhoff,  
525 P. (2004). *cis*-Regulatory elements for mesophyll-specific gene expression in the C<sub>4</sub>  
526 plant *Flaveria trinervia*, the promoter of the C<sub>4</sub> phosphoenolpyruvate carboxylase  
527 gene. *Plant Cell* 16: 1077–1090.
- 528 Grant, C.E., Bailey, T.L., and Noble, W.S. (2011). FIMO: scanning for occurrences of a  
529 given motif. *Bioinforma.* 27: 1017–1018.
- 530 Griffiths, H., Weller, G., Toy, L.F., and Dennis, R.J. (2013). You're so vein: bundle sheath  
531 physiology, phylogeny and evolution in C<sub>3</sub> and C<sub>4</sub> plants. *Plant Cell Env.* 36: 249–261.

- 532 Gupta, S., Stamatoyannopoulos, J.A., Bailey, T.L., and Noble, W.S. (2007). Quantifying  
533 similarity between motifs. *Genome Biol.* 8: R24.
- 534 Hernandez-Garcia, C.M. and Finer, J.J. (2014). Identification and validation of promoters  
535 and cis-acting regulatory elements. *Plant Sci.* 217–218: 109–119.
- 536 Hesselberth, J.R., Chen, X., Zhang, Z., Sabo, P.J., Sandstrom, R., Reynolds, A.P.,  
537 Thurman, R.E., Neph, S., Kuehn, M.S., Noble, W.S., Fields, S., and  
538 Stamatoyannopoulos, J. a (2009). Global mapping of protein-DNA interactions in vivo  
539 by digital genomic footprinting. *Nat. Methods* 6: 283–9.
- 540 Jefferson, R.A., Kavanagh, T.A., and Bevan, M.W. (1987). GUS fusions:  $\beta$ -Glucuronidase  
541 as a sensitive and versatile gene fusion marker in higher plants. *EMBO J.* 6: 3901–  
542 3907.
- 543 Kajala, K., Williams, B.P., Brown, N.J., Taylor, L.E., and Hibberd, J.M. (2011). Multiple  
544 Arabidopsis genes primed for direct recruitment into C<sub>4</sub> photosynthesis. *Plant J.* 69:  
545 47–56.
- 546 Kinsman, E.A. and Pyke, K.A. (1998). Bundle sheath cells and cell-specific plastid  
547 development in Arabidopsis leaves. *Development* 125: 1815–1822.
- 548 Kirschner, S., Woodfield, H., Prusko, K., Koczor, M., Gowik, U., Hibberd, J.M., and  
549 Westhoff, P. (2018). Expression of SULTR2;2, encoding a low-affinity sulphur  
550 transporter, in the Arabidopsis bundle sheath and vein cells is mediated by a positive  
551 regulator. *J. Exp. Bot.* <http://dx.doi.org/10.1093/jxb/ery263>.
- 552 Koroleva, O.A., Gibson, T.M., Cramer, R., and Stain, C. (2010). Glucosinolate-  
553 accumulating S-cells in Arabidopsis leaves and flower stalks undergo programmed  
554 cell death at early stages of differentiation. *Plant J.* 64: 456–469.
- 555 Koroleva, O., Farrar, J., Tomos, A., and Pollock, C. (1997). Patterns of solute in individual  
556 mesophyll, bundle sheath and epidermal cells of barley leaves induced to accumulate  
557 carbohydrate. *New Phytol.* 136: 97–104.
- 558 Leegood, R.C. (2008). Roles of the bundle sheath cells in leaves of C<sub>3</sub> plants. *J. Exp. Bot.*  
559 59: 1663–1673.
- 560 Li, Y., Sawada, Y., Hirai, A., Sato, M., Kuwahara, A., Yan, X., and Hirai, M.Y. (2013).  
561 Novel Insights Into the Function of Arabidopsis R2R3-MYB Transcription Factors  
562 Regulating Aliphatic Glucosinolate Biosynthesis. *Plant Cell Physiol.* 54: 1335–1344.
- 563 Liu, Q., Kasuga, M., Sakuma, Y., Abe, H., Miura, S., Yamaguchi-Shinozaki, K., and  
564 Shinozaki, K. (1998). Two Transcription Factors, DREB1 and DREB2, with an  
565 EREBP/AP2 DNA Binding Domain Separate Two Cellular Signal Transduction  
566 Pathways in Drought- and Low-Temperature-Responsive Gene Expression,

- 567           Respectively, in *Arabidopsis*. *Plant Cell* 10: 1391 LP-1406.
- 568   Ma, S., Shah, S., Bohnert, H.J., Snyder, M., and Dinesh-Kumar, S.P. (2013). Incorporating  
569       Motif Analysis into Gene Co-expression Networks Reveals Novel Modular Expression  
570       Pattern and New Signaling Pathways. *PLoS Genet* 9: e1003840.
- 571   Malitsky, S., Blum, E., Less, H., Venger, I., Elbaz, M., Morin, S., Eshed, Y., and Aharoni,  
572       A. (2008). The Transcript and Metabolite Networks Affected by the Two Clades of  
573       *Arabidopsis* Glucosinolate Biosynthesis Regulators. *Plant Physiol.* 148: 2021–2049.
- 574   Matsukura, S., Mizoi, J., Yoshida, T., Todaka, D., Ito, Y., Maruyama, K., Shinozaki, K., and  
575       Yamaguchi-Shinozaki, K. (2010). Comprehensive analysis of rice DREB2-type genes  
576       that encode transcription factors involved in the expression of abiotic stress-  
577       responsive genes. *Mol. Genet. Genomics* 283: 185–196.
- 578   Nakagawa, T., Kurose, T., Hino, T., Tanaka, K., Kawamukai, M., Niwa, Y., Toyooka, K.,  
579       Matsuoka, K., Jinbo, T., and Kimura, T. (2007). Development of series of gateway  
580       binary vectors, pGWBs, for realizing efficient construction of fusion genes for plant  
581       transformation. *J Biosci Bioeng* 104: 34–41.
- 582   O'Malley, R.C., Huang, S.C., Song, L., Lewsey, M.G., Bartlett, A., Nery, J.R., Galli, M.,  
583       Gallavotti, A., and Ecker, J.R. (2016). Cistrome and Epicistrome Features Shape the  
584       Regulatory DNA Landscape. *Cell* 165: 1280–1292.
- 585   Pruneda-Paz, J.L., Breton, G., Nagel, D.H., Kang, S.E., Bonaldi, K., Doherty, C.J., Ravelo,  
586       S., Galli, M., Ecker, J.R., and Kay, S.A. (2014). A Genome-Scale Resource for the  
587       Functional Characterization of *Arabidopsis* Transcription Factors. *Cell Rep.* 8: 622–  
588       632.
- 589   Reece-Hoyes, J.S., Diallo, A., Lajoie, B., Kent, A., Shrestha, S., Kadreppa, S., Pesyna, C.,  
590       Dekker, J., Myers, C.L., and Walhout, A.J.M. (2011). Enhanced yeast one-hybrid  
591       (eY1H) assays for high-throughput gene-centered regulatory network mapping. *Nat.*  
592       *Methods* 8: 1059–1064.
- 593   Reyna-Llorens, I., Burgess, S.J., Reeves, G., Singh, P., Stevenson, S.R., Williams, B.P.,  
594       Stanley, S., and Hibberd, J.M. (2018). Ancient duons may underpin spatial patterning  
595       of gene expression in C<sub>4</sub> leaves. *Proc. Natl. Acad. Sci.:*  
596       doi.org/10.1073/pnas.1720576115.
- 597   Sage RF. Environmental and evolutionary preconditions for the origin and diversification of  
598       the C<sub>4</sub> photosynthetic syndrome. *Plant Biol.* 2001;3:202--13.
- 599   Sakuma, Y., Maruyama, K., Osakabe, Y., Qin, F., Seki, M., Shinozaki, K., and Yamaguchi-  
600       Shinozaki, K. (2006). Functional Analysis of an *Arabidopsis* Transcription Factor,  
601       DREB2A, Involved in Drought-Responsive Gene Expression. *Plant Cell* 18: 1292–

- 602 1309.
- 603 Schweizer, F., Fernández-Calvo, P., Zander, M., Diez-Diaz, M., Fonseca, S., Glauser, G.,  
604 Lewsey, M.G., Ecker, J.R., Solano, R., and Reymond, P. (2013). Arabidopsis Basic  
605 Helix-Loop-Helix Transcription Factors MYC2, MYC3, and MYC4 Regulate  
606 Glucosinolate Biosynthesis, Insect Performance, and Feeding Behavior. *Plant Cell* 25:  
607 3117–3132.
- 608 Shatil-Cohen, A., Attia, Z., and Moshelion, M. (2011). Bundle-sheath cell regulation of  
609 xylem-mesophyll water transport via aquaporins under drought stress: a target of  
610 xylem-borne ABA? *Plant J.* 67: 72–80.
- 611 Sørderby, I.E., Burow, M., Rowe, H.C., Kliebenstein, D.J., and Halkier, B.A. (2010). A  
612 Complex Interplay of Three R2R3 MYB Transcription Factors Determines the Profile  
613 of Aliphatic Glucosinolates in Arabidopsis. *Plant Physiol.* 153: 348–363.
- 614 Sørderby, I.E., Hansen, B.G., Bjarnholt, N., Ticconi, C., Halkier, B.A., and Kliebenstein,  
615 D.J. (2007). A Systems Biology Approach Identifies a R2R3 MYB Gene Subfamily  
616 with Distinct and Overlapping Functions in Regulation of Aliphatic Glucosinolates.  
617 *PLoS One* 2: e1322.
- 618 Sparks, E.E. et al. (2017). Establishment of Expression in the SHORTROOT-  
619 SCARECROW Transcriptional Cascade through Opposing Activities of Both  
620 Activators and Repressors. *Dev. Cell* 39: 585–596.
- 621 Stracke, R., Werber, M., and Weisshaar, B. (2001). The R2R3-MYB gene family in  
622 Arabidopsis thaliana. *Curr Opin Plant Biol* 4: 447–56.
- 623 Sullivan, A.M. et al. (2014). Mapping and dynamics of regulatory DNA and transcription  
624 factor networks in *A. thaliana*. *Cell Rep.* 8: 2015–2030.
- 625 Takahashi, H., Watanabe-Takahashi, A., Smith, F.W., Blake-Kalff, M., Hawkesford M.J.,  
626 and Saito, K. (2000). The roles of three functional sulphate transporters involved in  
627 uptake and translocation of sulphate in Arabidopsis thaliana. *Plant J.* 23: 171–182.
- 628 Tamara, G., Martin, E., Ruslan, Y., Caroline, M., and Ulf-Ingo, F. (2007). HAG2/MYB76  
629 and HAG3/MYB29 exert a specific and coordinated control on the regulation of  
630 aliphatic glucosinolate biosynthesis in Arabidopsis thaliana. *New Phytol.* 177: 627–  
631 642.
- 632 Ulmasov, T., Liu, Z.B., Hagen, G., and Guilfoyle, T.J. (1995). Composite structure of auxin  
633 response elements. *Plant Cell* 7: 1611 LP-1623.
- 634 Ulmasov, T., Murfett, J., Hagen, G., and Guilfoyle, T.J. (1997). Aux/IAA proteins repress  
635 expression of reporter genes containing natural and highly active synthetic auxin  
636 response elements. *Plant Cell* 9: 1963 LP-1971.

- 637 Vainonen, J.P., Jaspers, P., Wrzaczek, M., Lamminmäki, A., Reddy, R.A., Vaahtera, L.,  
638 Brosché, M., and Kangasjärvi, J. (2012). RCD1–DREB2A interaction in leaf  
639 senescence and stress responses in *Arabidopsis thaliana*. *Biochem. J.* 442: 573 LP-  
640 581.
- 641 Wang, P., Khoshravesh, R., Karki, S., Tapia, R., Balahadia, C.P., Bandyopadhyay, A.,  
642 Quick, W.P., Furbank, R., Sage, T.L., and Langdale, J.A. (2017). Re-creation of a Key  
643 Step in the Evolutionary Switch from C<sub>3</sub> to C<sub>4</sub> Leaf Anatomy. *Curr. Biol.* 27: 3278–  
644 3287.e6.
- 645 Weber, E., Engler, C., Gruetzner, R., Werner, S., and Marillonnet, S. (2011). A Modular  
646 Cloning System for Standardized Assembly of Multigene Constructs. *PLoS One* 6:  
647 e16765.
- 648 Williams, B.P., Burgess, S.J., Reyna-Llorens, I., Knerova, J., Aubry, S., Stanley, S., and  
649 Hibberd, J.M. (2016). An untranslated *cis*-element regulates the accumulation of  
650 multiple C<sub>4</sub> enzymes in *Gynandropsis gynandra* mesophyll cells. *Plant Cell* 28: 454–  
651 465.
- 652 Williams, M., Thomas, B., Farrar, J., and Pollock, C. (2018). Visualizing the distribution of  
653 elements within barley leaves by energy dispersive X-ray image maps (EDX maps).  
654 *New Phytol.* 125: 367–372.
- 655 Wiludda, C., Schulze, S., Gowik, U., Engelmann, S., Koczor, M., Streubel, M., Bauwe, H.,  
656 and Westhoff, P. (2012). Regulation of the photorespiratory *GLDPA* gene in C<sub>4</sub>  
657 *Flaveria*: an intricate interplay of transcriptional and posttranscriptional processes.  
658 *Plant Cell* 24: 137–151.
- 659 Wu, R., Duan, L., Pruneda-Paz, J., Oh, D.-H., Pound, M.P., Kay, S.A., and Dinneny, J.R.  
660 (2018). The 6xABRE synthetic promoter enables the spatiotemporal analysis of ABA-  
661 mediated transcriptional regulation. *Plant Physiol.*
- 662 Wysocka-Diller, J.W., Helariutta, Y., Fukaki, H., Malamy, J.E., and Benfey, P.N. (2000).  
663 Molecular analysis of SCARECROW function reveals a radial patterning mechanism  
664 common to root and shoot. *Development* 127: 595–603.
- 665 Zhang, T., Marand, A.P., and Jiang, J. (2016). PlantDHS: a database for DNase I  
666 hypersensitive sites in plants. *Nucleic Acids Res.* 44: D1148–D1153.
- 667 Zhang, W., Zhang, T., Wu, Y., and Jiang, J. (2012). Genome-Wide Identification of  
668 Regulatory DNA Elements and Protein-Binding Footprints Using Signatures of Open  
669 Chromatin in *Arabidopsis*. *Plant Cell Online* 24: 2719–2731.
- 670 Zhu, B., Zhang, W., Zhang, T., Liu, B., and Jiang, J. (2015). Genome-Wide Prediction and  
671 Validation of Intergenic Enhancers in *Arabidopsis* Using Open Chromatin Signatures.

672 Plant Cell 27: 2415 LP-2426.



673 **Figure legends**

674 **Figure 1: The *MYB76* promoter contains a region necessary for bundle sheath**  
675 **specific expression.** Schematics of deletion series (left), representative images of GUS in  
676 *A. thaliana* leaves (centre) and quantification of MUG activity via the fluorometric assay  
677 (right). (A) The *MYB76* genomic sequence. (B) The *MYB76* promoter including the first two  
678 exons and the first intron fused to the *uidA*. (C-E) A region between -1264 and -796bp is  
679 responsible for GUS accumulation in the bundle sheath. Staining times are given in the top  
680 right corner of each leaf image. The fluorometric MUG assay shows quantitative  
681 repressors and enhancers are located in the gene and in the promoter respectively (A-C  
682 right). X-axis shows GUS activity and individual biological replicates are ordered randomly  
683 on the y-axis. n, number of replicates; \*, p value < 0.05; \*\* p value < 0.001. Scale bars  
684 represent 100µm.

685

686 **Figure 2: A DNaseI Hypersensitive Site in *pMYB76* is sufficient for expression in the**  
687 **bundle sheath.** (A) The *MYB76* promoter contains a DNaseI Hypersensitive Site (DHS)  
688 located between nucleotides -909 to -654. DHS shown as the DHS score (Zhang et al.,  
689 2016) from flower buds (top) and leaves (bottom). Data from Zhang et al., (2012) and  
690 visualised with the IGV browser. (B) Deletion of the DHS abolishes GUS accumulation in  
691 the bundle sheath. (C) The DHS fused to the minimal CaMV35S promoter is sufficient to  
692 direct expression in the bundle sheath. (D) Oligomerising the DHS increases GUS  
693 accumulation in the bundle sheath. Staining times are given in the top right corner of each  
694 image. Scale bars represent 100µm.

695

696 **Figure 3: The DNaseI Hypersensitive Site is conserved in the Brassicaceae.** (A)  
697 Single nucleotide polymorphisms (red) in the DHS region from 1135 accessions of *A.*  
698 *thaliana*. The region necessary for bundle sheath expression is underlined. (B) Alignment  
699 of nucleotides -909 to -796 of *MYB76* from *A. thaliana* to five additional species of the  
700 Brassicaceae. (C) Conservation profile shows three sections of high nucleotide  
701 conservation in the Brassicaceae, two of which coincide with the region in DHS that is  
702 required for expression in the bundle sheath.

703

704 **Figure 4: A TGCACCG motif within the DHS is necessary and sufficient for**  
705 **preferential expression in the bundle sheath** (A) Two digital footprints (DGF) were  
706 predicted based on the position of DNaseI digestion sites in the *pMYB76* DHS. (B) Two  
707 motifs common to other promoters driving bundle sheath expression in *A. thaliana*. (C)

708 DGF II (underlined) overlaps with a TGCACCG motif (gold text). (D) Mutation of the  
709 TGCACCG motif leads to loss of GUS. (E) Oligomerization of the TGCACCG motif  
710 generates bundle sheath specific expression. GUS staining time was 48hrs. Scale bars  
711 represent 100µm.

712

713 **Figure 5: DREB2A and DREB26 bind the MYB76 DHS.** Transcription factors that bind  
714 the DHS were investigated using Yeast One-Hybrid (Y1-H) and *in planta* promoter/TF  
715 interaction assays. (A) Schematic demonstrating transcription factors that interact with the  
716 MYB76 DHS as indicated by Y1-H. Blue locus identifiers are DREB2A, DREB26, DF1 and  
717 MYB73. (B) MYB76 DHS sequence with the best matching sequence marked for the  
718 binding sites of DREB26 (bold), DREB2A (underlined reverse complement), MYB73  
719 (italics) and DF1 (dashed underlined). The TGCACCG motif is coloured in gold. (C)  
720 Comparison of the TGCACCG motif with the DAP-seq defined binding sites of DREB2A,  
721 DREB26, DF1 and MYB73. Numbers under motifs show the position of bases in the motif.  
722 Likelihood of matching the TGCACCG motif by chance is indicated by p-values. D) Three  
723 biological replicates of *N. benthamiana* co-infiltrated with candidate transcription factors  
724 and the MYB76 DHS. Clockwise from top left: (1) *CaMV35S::DREB2A* and  
725 *pMYB76DHS:CaMV35SMin::uidA*, (2) *CaMV35S::DREB26* and  
726 *pMYB76DHS:CaMV35SMin::uidA*, (3) *CaMV35S::uidA* and (4)  
727 *pMYB76DHS:CaMV35SMin::uidA*. Staining time was 48hrs. Scale bars represents 2cm.

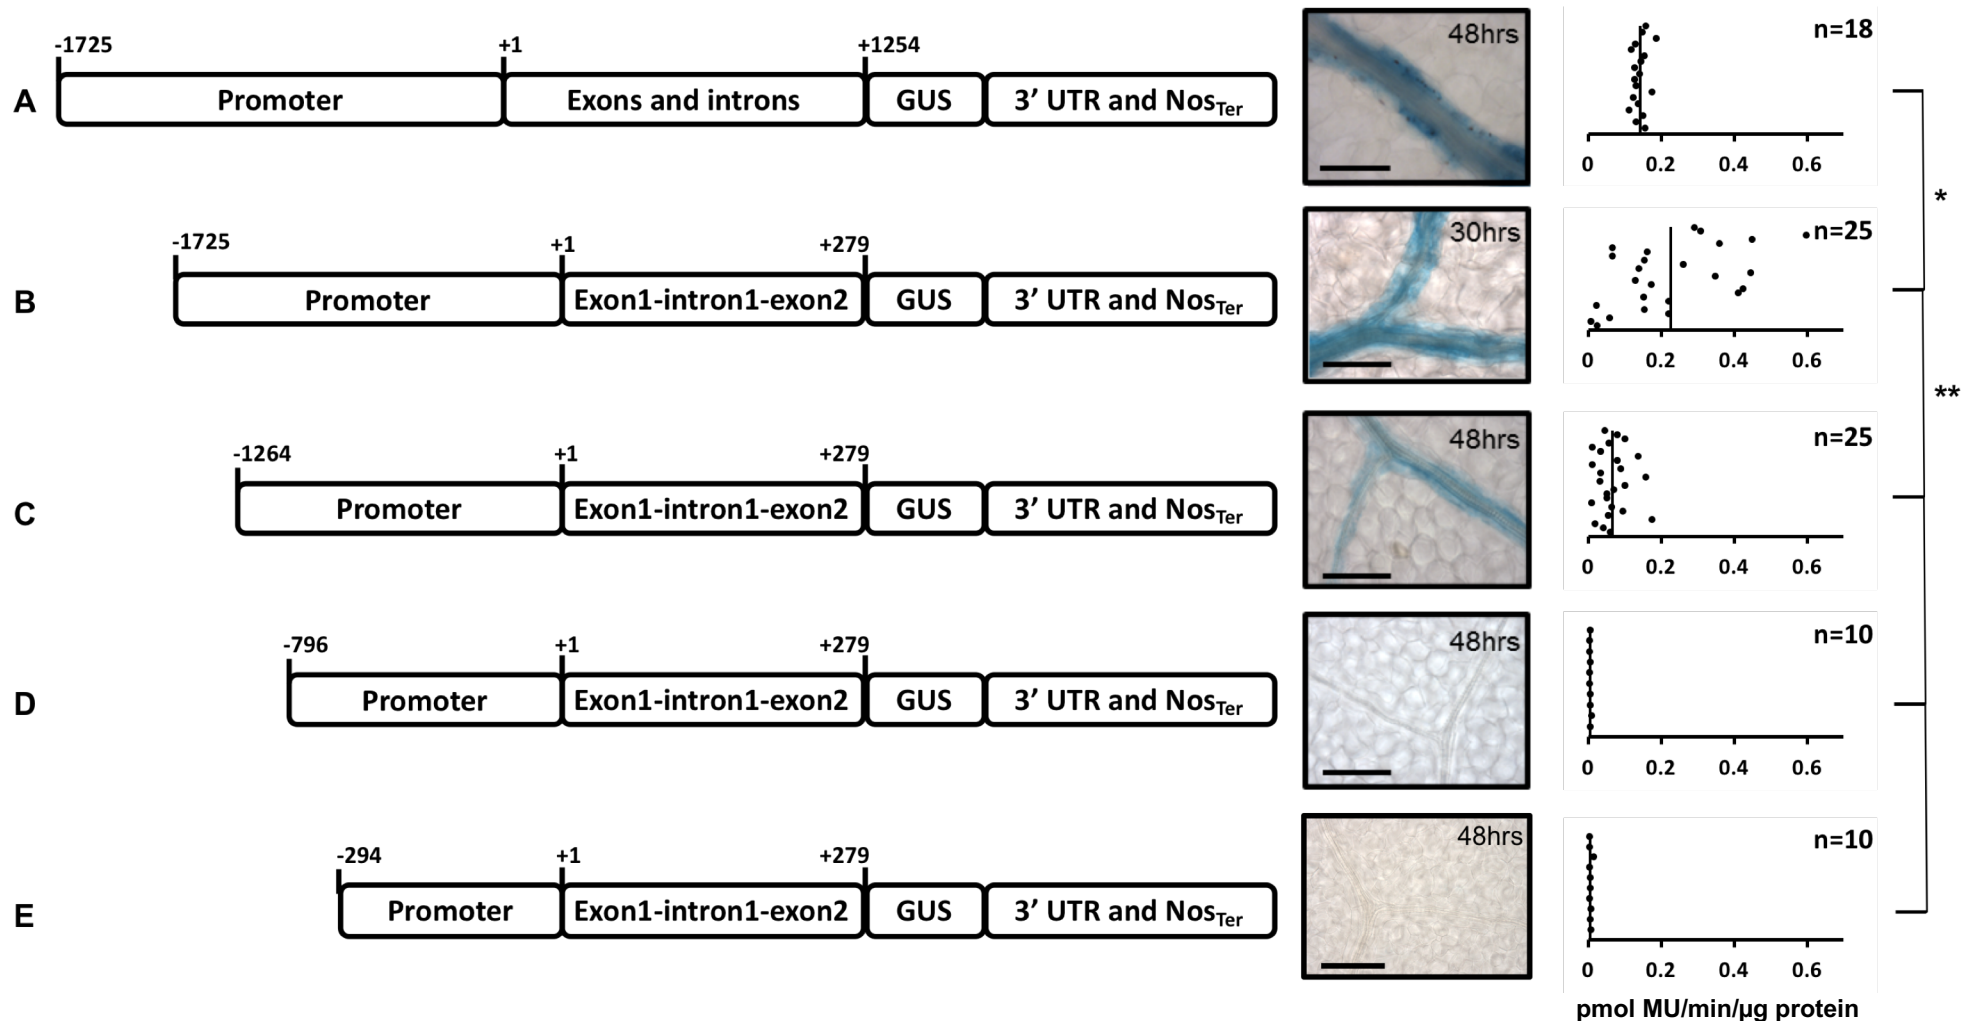

**Figure 1: The *MYB76* promoter contains a region necessary for bundle sheath specific expression.** Schematics of deletion series (left), representative images of GUS in *A. thaliana* leaves (centre) and quantification of MUG activity via the fluorometric assay (right). (A) The *MYB76* genomic sequence. (B) The *MYB76* promoter including the first two exons and the first intron fused to the *uidA*. (C-E) A region between -1264 and -796bp is responsible for GUS accumulation in the bundle sheath. Staining times are given in the top right corner of each leaf image. The fluorometric MUG assay shows quantitative repressors and enhancers are located in the gene and in the promoter respectively (A-C right). X-axis indicates GUS activity and individual biological replicates are ordered randomly on the y axis. n, number of replicates; \*, p value < 0.05; \*\* p value < 0.001. Scale bars represent 100μm.

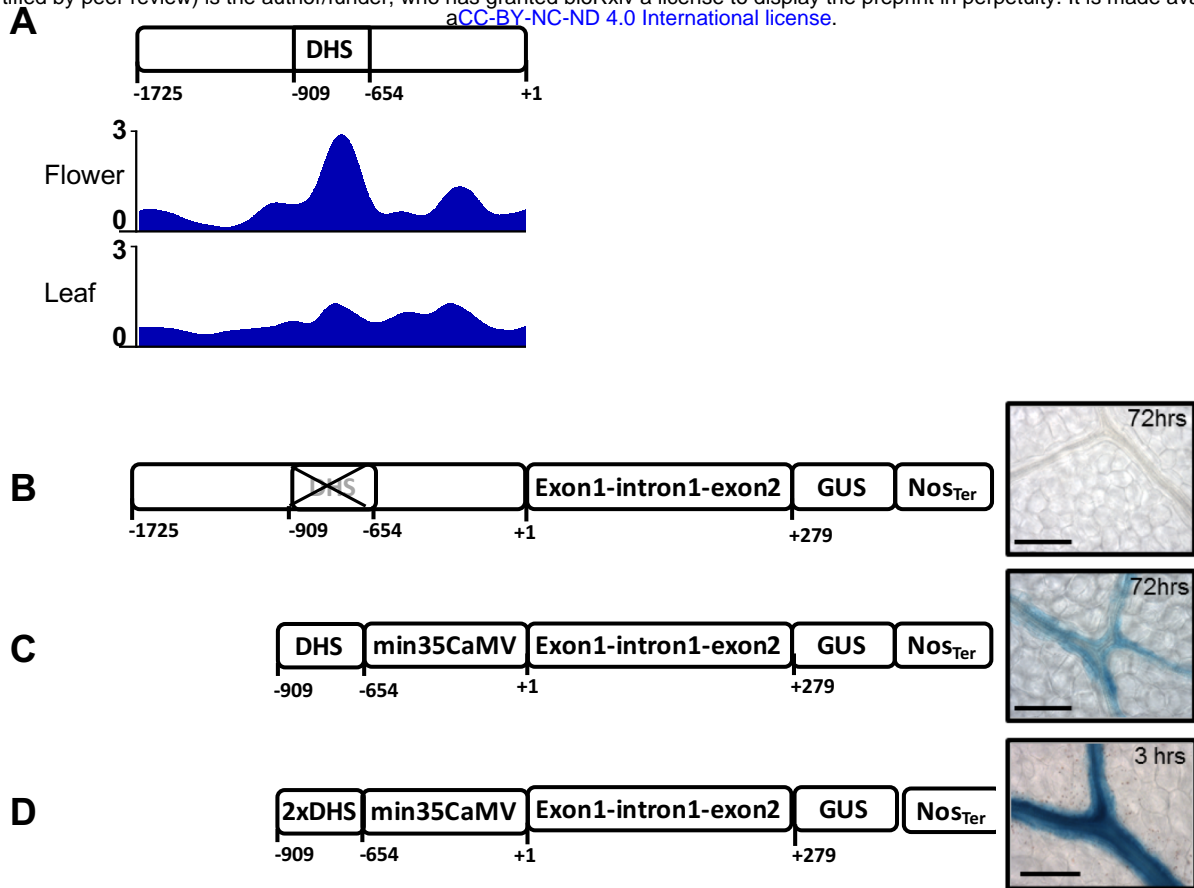

**Figure 2: A DNase I Hypersensitive Site in *pMYB76* is sufficient for expression in the bundle sheath.** (A) The *MYB76* promoter contains a single DNase I Hypersensitive Site (DHS) located from nucleotides -909 to -654. DHS shown as the DHS score (Zhang et al., 2015) from flower buds (top) and leaves (bottom). Data from Zhang et al (2012) and visualised with the IGV browser. (B) Deletion of the DHS abolishes GUS accumulation in the bundle sheath. (C) The DHS fused to the minimal CaMV35S promoter is sufficient to direct expression in the bundle sheath. (D) Oligomerising the DHS increases GUS accumulation in the bundle sheath. Staining times are given in the top right corner of each image. Scale bars represent 100µm.

909 GAAGATAGCA CGTGAATTTA AGCAGAAA AAAAATAAAG TGGATAGACA CTAGACGGAC  
 -849 AGCAAGGCTG TGTGACATAT ATGGGCAGAT AGACAAAGAA GCCGAAAAAC GTGCACCGTC  
 -789 CAAGATTCTG GCTACTATAC CTAATTTCC TCCCGCAGGG ACTTGACAAA TATCACTATC  
 -729 TGCCATTTTT AGTTTATTT TGTATTGGTG TCAAAGAATT GAAATAATGA ACAACGGTCG  
 -669 TAAAAAGATG TAAATG

**B**

```

    -909                                     -879
    A. thaliana  -GATGATA-----ACCTGAATTTAATGACAAAAA AAAAAAAGTGGATAGA-----
    A. lyrata    -GATCATA-----GATACATAATACCTTAATT-AATGACGCAAT--AAAAAAGTGGATAGA-----
    Boechnera stricta  -TATGCTTGGCAAAATAATTAGACCAAAAAGTAACTGGAAC TGAACCAAAA-----
    Capsella grandif. AGCTGTTAT-----CTTTGACACAGTATATATATAA-TGCGCGAAAAATTTAGTTTATCAATTAATTTTATTTGACA
    Capsella rubella  -GATGTTAT-----CTTTTACACAGTCTATATATAT--GCGCGAAAAATTTAGTTTATCAATTAATTTTATTTGACA
    Brassica rapa  A-ATTACATTCAAGCACATTTTATTATAAGTTTCTATACATAAACAGAGA--AG-----GTTTGAGAGG

    -849
    A. thaliana  -----GACTAGAGGGACAGCAAGGCTGTGTGAC-----TATAT-----
    A. lyrata    -----GCCTAGAGGGA-----AAGGCTGTGACA-----TTGTATAT-----
    Boechnera stricta  -----GAAGAG-ACATTGACTCGAACAGGAAC TAAACCAAAAAT AACC GAACATGACCTAACTTCTATATCTAAAGAA
    Capsella grandif. TC-TAAGGATCAGCATAAT-----ATTTATCATCTCAAGGATCTGTATTATTATTAAACATGCA
    Capsella rubella  TCTTAAGGATCAGCATAAT-----ATTTATCATCTCAAGGATCTGTATTATTATTAAACATGCA
    Brassica rapa  CACTATGGATGTAACCGA-GACT-----TTTACCTTTCATCGTACTCTCAGTGATT-----

    -819
    A. thaliana  -----G--GGCAGATAGACAAAGAAAGCCGAA--AAACSTGCACCG
    A. lyrata    -----GGGAGGAAGACAGACAAAGAAAGCCCAA--AAACSTGCACCG
    Boechnera stricta  -----CTGATA-----CCGAATCCAAA-CCGAAT-----CCGAACCAAAACGGGTACCT
    Capsella grandif. AAATACCGATATATTA AAAAATGACAAAGCTGGTTTC--AAGTACAGACCAAAAACAATAATTTATAAAA-GTGTAGGG
    Capsella rubella  AAATACCGATATATTA AAAAATGACAAAGCTGGTTTC--AAGTACAGACCAAAAACAATAATTTATAAAA-GTGTAGGG
    Brassica rapa  -----CG-----GACAT-GA-GCATTT--ATCTGACAACA-----CTGTGAGAAA--GCACCG
    
```

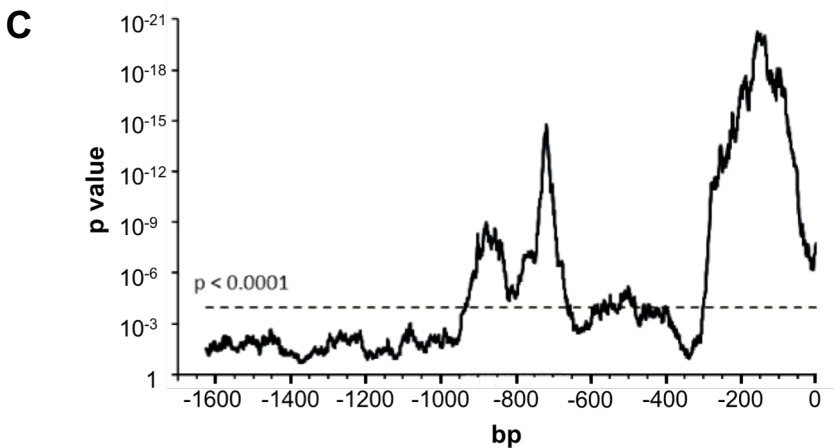

**Figure 3: The DNaseI Hypersensitive Site is conserved in the Brassicaceae.** (A) Single nucleotide polymorphisms (red) in the DHS region from 1135 accessions of *A. thaliana*. The region necessary for bundle sheath expression is underlined. (B) Alignment of nucleotides -909 to -796 of *MYB76* from *A. thaliana* to five additional species of the Brassicaceae. (C) Conservation profile shows three sections of high nucleotide conservation in the Brassicaceae, two of which coincide with the region in DHS that is required for expression in the bundle sheath.

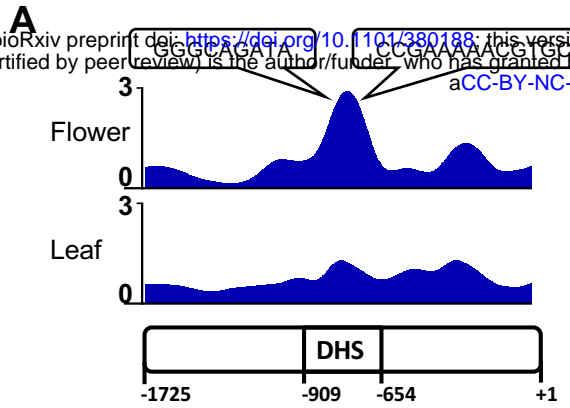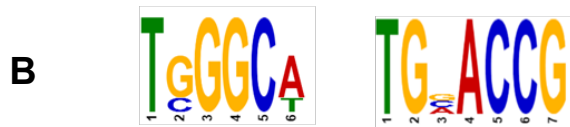

**C**

CCGAAAAACGTGCACCGTCCAAGATTC

DGF

**D**

CCGAAAAACGTGCACCGTCCAAGATTC

CCGAAAAACGGAAGTCTCCAAGATTC

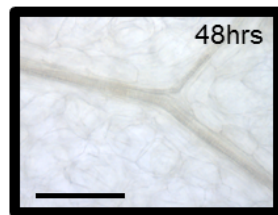

**E**

CCGAAAAACGTGCACCGTCCAAGATTC x2

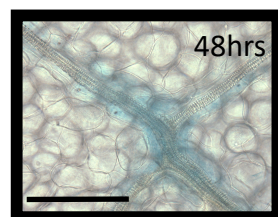

**Figure 4: A TGCACCG motif within the DHS is necessary and sufficient for preferential expression in the bundle sheath** (A) Two digital footprints (DGF) were predicted based on the position of DNaseI digestion sites in the *pMYB76* DHS. DHS shown as the DHS score (Zhang et al., 2015) from flower buds (top) and leaves (bottom). (B) Two motifs common to other promoters driving bundle sheath expression in *A. thaliana*. (C) DGF II (underlined) overlaps with a TGCACCG motif (gold text). (D) Mutation of the TGCACCG motif leads to loss of GUS. (E) Oligomerization of the TGCACCG motif generates bundle sheath specific expression. GUS staining time was 48hrs. Scale bars represent 100 $\mu$ m.

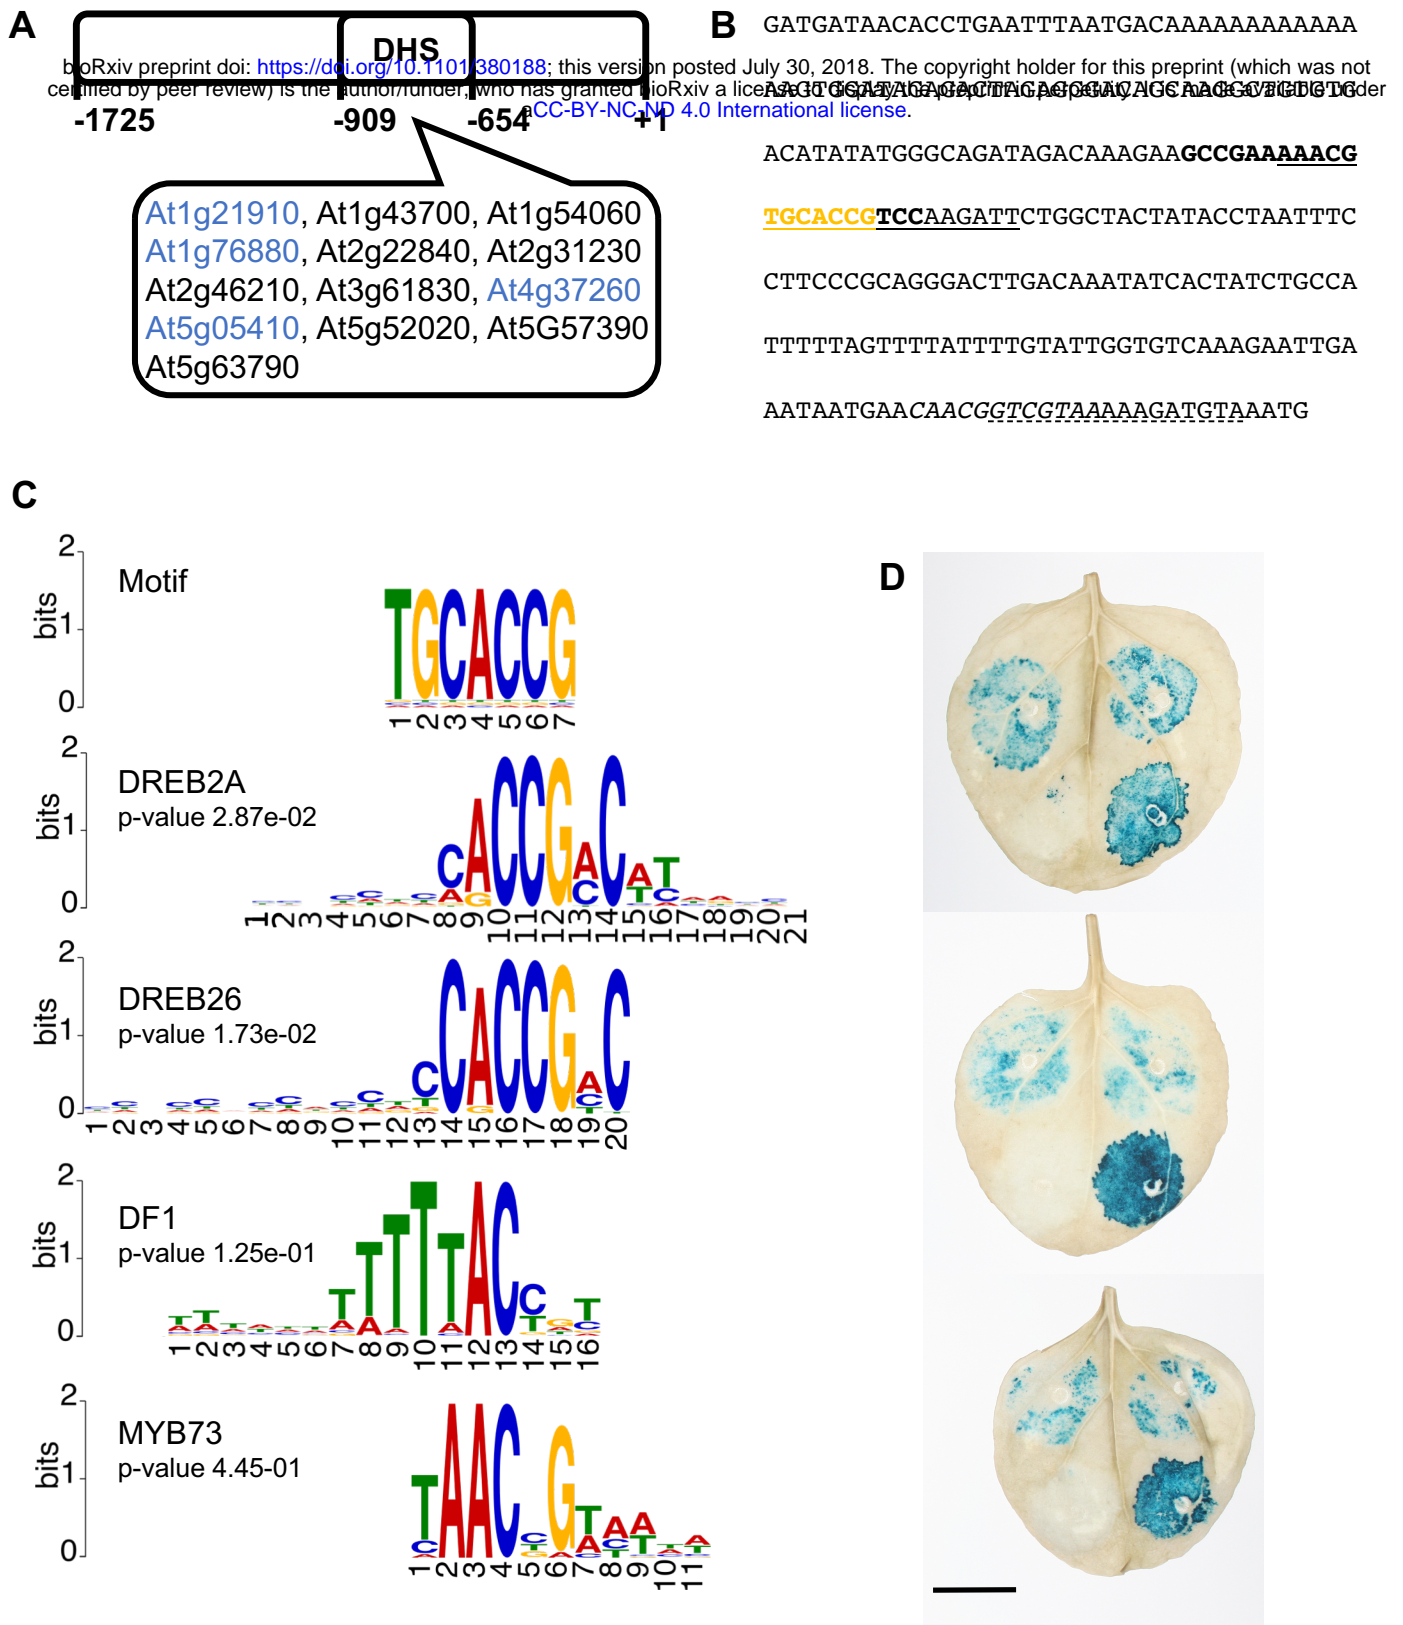

**Figure 5: DREB2A and DREB26 bind the MYB76 DHS.** Transcription factors binding the DHS were identified using Yeast One-Hybrid (Y1-H) and assays *in planta*. (A) Schematic demonstrating transcription factors that interact with the MYB76 DHS *in Y1-H*. Blue locus identifiers are DREB2A, DREB26, DF1 and MYB73. (B) MYB76 DHS sequence marked with the best matching sequence for DREB26 (bold), DREB2A (underlined reverse complement), MYB73 (italics) and DF1 (dashed underlined) binding sites. The TGCACCG motif is coloured in gold. (C) Comparison of the TGCACCG motif with DAP-seq defined binding sites of DREB2A, DREB26, DF1 and MYB73. Numbers under motifs show the position of bases in the motif. Likelihood of matching the TGCACCG motif by chance is indicated by p-value. (D) Three biological replicates of *N. benthamiana* co-infiltrated with candidate transcription factors and the MYB76 DHS. Within each leaf clockwise from top left: (1) *CaMV35S::DREB2A* and *pMYB76DHS::CaMV35SMin::uidA*, (2) *CaMV35S::DREB26* and *pMYB76DHS::CaMV35SMin::uidA*, (3) *CaMV35S::uidA* and (4) *pMYB76DHS::CaMV35SMin::uidA*. Staining time was 48hrs. Scale bars represents 2cm.
